# Supplementary material for: Biomacromolecular quantitative structure–activity relationship (BioQSAR): a proof-of-concept study on the modeling, prediction and interpretation of protein–protein binding affinity
Source: Springer Nature journal article supplement (doi:10.1007/s10822-012-9625-3), 2013-01-01
Supplement: 10822_2012_9625_MOESM1_ESM.pdf [file 10822_2012_9625_MOESM1_ESM.pdf]

**Table S1. A list of the 144 protein-protein complexes**

**Training set**

| Complex <i>a</i> | Experimental condition and method    |                  |                                                                                                                  |                                            | Experimental affinity    |                        | Fitted affinity (p <i>K<sub>a</sub></i> ) |        |        |
|------------------|--------------------------------------|------------------|------------------------------------------------------------------------------------------------------------------|--------------------------------------------|--------------------------|------------------------|-------------------------------------------|--------|--------|
|                  | pH                                   | Temperature (°C) | Buffer                                                                                                           | Assay method                               | <i>K<sub>d</sub></i> (M) | p <i>K<sub>a</sub></i> | GA-PLS                                    | GA-SVM | GA-GP  |
| 1A2K_C:AB        | 7.5                                  | 25               | 20 mM KH <sub>2</sub> PO <sub>4</sub> , 5 mM MgCl <sub>2</sub>                                                   | ITC                                        | 1.5E-07                  | 6.824                  | 7.162                                     | 6.003  | 6.581  |
| 1ACB_E:I         | 8.0                                  | 21               | 0.1M PBS                                                                                                         | Spectrophotometric inhibition assay        | 2.0E-10                  | 9.699                  | 7.674                                     | 9.608  | 9.891  |
| 1AKJ_AB:DE       | 7.4                                  | 25               | 10 mM HEPES, 3.4 mM EDTA, and 0.005% Surfactant P20, 150mM NaCl                                                  | SPR                                        | 1.3E-04                  | 3.886                  | 5.753                                     | 3.858  | 3.551  |
| 1AVX_A:B         | 8.3                                  | 20               | not stated                                                                                                       | Potentiometric                             | 4.8E-10                  | 9.319                  | 8.484                                     | 10.300 | 8.819  |
| 1B6C_A:B         | 7.4                                  | 25               | 20mM Hepes, 1mM EDTA, 0.05% P20,150mM NaCl                                                                       | SPR                                        | 2.8E-07                  | 6.553                  | 7.091                                     | 5.309  | 6.675  |
| 1BJ1_HL:VW       | 4.8                                  | 25               | 20 mM sodium acetate                                                                                             | SPR                                        | 3.4E-09                  | 8.469                  | 7.701                                     | 7.775  | 8.487  |
| 1BVK_DE:F        | 7.0                                  | 20               | 25 mM NaH <sub>2</sub> PO <sub>4</sub> , 0.2 mM-EDTA, 125 mM NaCl                                                | Stopped-flow inhibition                    | 1.4E-08                  | 7.854                  | 6.905                                     | 7.078  | 8.080  |
| 1BVN_P:T         | not stated (BIAcore standard is 7.4) | 25               | not stated, but BIAcore standard buffer is 10 mM HEPES, 3.4 mM EDTA, 0.001% surfactant P-20, 150mM NaCl          | SPR                                        | 9.2E-12                  | 11.036                 | 10.171                                    | 10.381 | 10.126 |
| 1DFJ_E:I         | 6.0                                  | 25               | 50mM MES-NaOH, 125 mM NaCl, 1 mM EDTA, 0.2 mM DTT, 0.1% poly(ethylene glycol), 0.2 mg of bovine serum albumin/mL | Inhibition assay (indirect-Upa Hydrolysis) | 5.9E-14                  | 13.229                 | 11.565                                    | 12.692 | 13.510 |
| 1E4K_AB:C        | 7.4                                  | 25               | 10 mM Hepes, 150 mM NaCl, 3.4 mM EDTA, and 0.005% surfactant P20                                                 | SPR                                        | 1.7E-06                  | 5.770                  | 6.941                                     | 7.115  | 7.399  |
| 1E96_A:B         | 7.0                                  | 18               | 25mM HEPES, 50mM NaCl, 5mM MgCl <sub>2</sub> , 2mM DTT                                                           | ITC                                        | 2.7E-06                  | 5.569                  | 6.169                                     | 6.333  | 6.238  |
| 1EAW_A:B         | 8.8                                  | room temperature | 50 mM Tris-HCl, 50mM NaCl, 0.01% Tween-20                                                                        | Fluorescence inhibition assay              | 5.0E-11                  | 10.301                 | 8.998                                     | 10.244 | 9.995  |
| 1EFN_B:A         | 7.4                                  | 25               | 10 mM HEPES, 3.4 mM EDTA, 0.05% Surfactant P20, 150 mM NaCl                                                      | SPR                                        | 3.8E-08                  | 7.420                  | 7.960                                     | 7.454  | 7.510  |
| 1EZU_C:AB        | 8.0                                  | 25               | 50 mM NaCl, 50 mM Tris, 10 mM CaCl <sub>2</sub>                                                                  | Spectroscopic inhibition assay             | 8.0E-11                  | 10.097                 | 8.719                                     | 9.385  | 8.774  |
| 1F34_A:B         | 2.0                                  | 37               | 10mM HCl                                                                                                         | Spectroscopic inhibition assay             | 1.0E-10                  | 10.000                 | 8.398                                     | 9.522  | 10.676 |
| 1FFW_A:B         | 7.4                                  | 28               | 20 mM sodium phosphate, 20 mM NaCl, 1 mM EDTA, 1 mM PMSF, 10% (v/v) glycerol                                     | ITC                                        | 1.4E-06                  | 5.854                  | 6.966                                     | 6.343  | 4.575  |

|            |            |                  |                                                                                                                 |                                       |         |        |        |        |        |
|------------|------------|------------------|-----------------------------------------------------------------------------------------------------------------|---------------------------------------|---------|--------|--------|--------|--------|
| 1FLE_E:I   | 7.5        | room temperature | 100 mM HEPES-NaOH, pH 7.5, 500mM NaCl, 10% Me2SO                                                                | Inhibition assay                      | 1.0E-09 | 9.000  | 9.117  | 9.514  | 9.756  |
| 1FQJ_A:B   | 8.0        | room temperature | 50 mmTris-HCl, 50 mm NaCl, 2 mmMgCl2+ PDEγ                                                                      | Fluorescence spectroscopy             | 6.7E-08 | 7.174  | 7.551  | 6.228  | 9.152  |
| 1GL1_A:I   | 8.0        | 25               | 50mM Tris, 20mM CaCl2                                                                                           | Inhibition assay                      | 2.0E-10 | 9.699  | 8.533  | 8.740  | 9.274  |
| 1GLA_G:F   | 7.0        | room temperature | 0.05 M triethanolamine-HCl (pH adjusted with KOH), 5 mM MgCl2, 20 mM KCl, 1 mM β-mercaptoethanol                | Spectroscopy                          | 1.1E-05 | 4.959  | 7.162  | 4.793  | 7.758  |
| 1GRN_A:B   | 8.0        | not stated       | 20 mm HEPES, pH 8.0, 5 mm MgCl2, 100 mm NaCl, 25 mM NaF                                                         | Fluorescence Spectroscopy             | 2.4E-07 | 6.620  | 6.349  | 5.624  | 4.935  |
| 1H9D_A:B   | 7.5        | 0                | 10mM Tris-HCl, 100mM NaCl, mM EDTA, 5mM DTT, 0.0002 mg/ml bovine serum albumin, 0.05% Triton X-100, 4% glycerol | Electrophoretic mobility shift assays | 4.5E-08 | 7.347  | 8.434  | 7.798  | 6.622  |
| 1HIA_AB:I  | not stated | not stated       | not stated                                                                                                      | Inhibition assay                      | 1.3E-08 | 7.886  | 8.056  | 6.498  | 7.398  |
| 1I2M_A:B   | 7.4        | 25               | 30 mM Potassium phosphate, 5mM MgCl2, 5mM EDTA                                                                  | Stopped-flow fluometry                | 2.5E-12 | 11.602 | 9.163  | 11.694 | 12.054 |
| 1I4D_D:AB  | 8.7        | 22               | 500mM NaCl, 2mM MgCl2, 0.5mM b-mercaptoethanol, 50 mM Tris                                                      | ITC                                   | 3.0E-06 | 5.523  | 5.911  | 7.031  | 4.818  |
| 1IJK_A:BC  | 7.4        | room temperature | 10mM Tris-HCl, 150mM NaCl                                                                                       | Radioligand binding                   | 2.3E-08 | 7.638  | 7.474  | 8.477  | 7.975  |
| 1IQD_AB:C  | 7.4        | not stated       | 10mM HEPES, containing 300mM NaCl, 5mM CaCl2, and 0.05% Tween-20                                                | SPR                                   | 1.4E-11 | 10.854 | 10.587 | 11.118 | 10.406 |
| 1JIW_P:I   | 7.0        | 25               | 50 mm MOPS, pH 7.0, 5mM CaCl2, 0.001% BSA, 0.500 mM, 2.4 M NaCl                                                 | Inhibition assay                      | 4.0E-12 | 11.398 | 10.198 | 12.140 | 10.376 |
| 1JTG_B:A   | 7.5        | 25               | 50nM NaCl, 25mM Tris-HCl                                                                                        | SPR                                   | 4.0E-10 | 9.398  | 8.950  | 9.810  | 6.650  |
| 1JWH_CD:A  | 8.5        | 35               | 500mM NaCl, 25mM Tris/HCl                                                                                       | ITC                                   | 1.3E-08 | 7.886  | 8.914  | 7.615  | 6.169  |
| 1KKL_ABC:H | 8.0        | 25               | 20 mM Tris-HCl, 0.005% surfactant P-20                                                                          | SPR                                   | 4.5E-08 | 7.347  | 7.208  | 6.853  | 8.193  |
| 1KLU_AB:D  | 7.5        | 25               | 10 mM Hepes, 3.4 mM EDTA, 150 mM NaCl, 0.005% Surfactant P-20                                                   | SPR                                   | 4.6E-06 | 5.337  | 6.269  | 6.341  | 5.845  |
| 1KXQ_H:A   | 7.4        | not stated       | 150 mM NaCl, 2mM CaCl2, 50 mM Tris 15 mM Hepes, 5 mM                                                            | SPR                                   | 3.5E-09 | 8.456  | 8.585  | 7.919  | 8.070  |

|             |            |                         |                                                                                            |                                |         |        |        |        |        |
|-------------|------------|-------------------------|--------------------------------------------------------------------------------------------|--------------------------------|---------|--------|--------|--------|--------|
| 1LFD_B:A    | 7.4        | 25                      | MgCl <sub>2</sub>                                                                          | Stopped-flow fluorescence      | 1.9E-06 | 5.721  | 5.452  | 6.670  | 5.977  |
| 1MQ8_A:B    | not stated | 25                      | Tris-buffered saline solution, 1mM MgCl <sub>2</sub>                                       | SPR                            | 3.0E-06 | 5.523  | 6.178  | 6.453  | 4.521  |
| 1NCA_HL:N   | 7.2        | room temperature        | PBS                                                                                        | Fluorescence inhibition assay  | 8.3E-09 | 8.081  | 7.328  | 6.690  | 7.571  |
| 1NVU_R:S    | 7.5        | not stated              | 25 mM Tris-Cl, 50 mM NaCl, 1 mM DTT                                                        |                                | 1.9E-06 | 5.721  | 6.365  | 4.691  | 5.334  |
| 1NW9_B:A    | 7.2        | 37                      | 20 mM Pipes, 10 mM EDTA, 20 mM 2-mercaptoethanol, 0.1% CHAPS and 10% sucrose               | Fluorescence inhibition assay  | 1.3E-08 | 7.886  | 7.867  | 10.124 | 7.610  |
| 1P2C_AB:C   | not stated | 25                      | PBS, 0.05% Tween 20                                                                        | SPR                            | 1.0E-10 | 10.000 | 9.472  | 10.108 | 10.825 |
| 1PVH_A:B    | 7.5        | 20                      | 10 mM HEPES, 200mM NaCl                                                                    | ITC                            | 8.0E-08 | 7.097  | 7.347  | 6.706  | 6.840  |
| 1PXV_A:C    | 7.8        | not stated              | 50 mM Tris-HCl, 2mM EDTA, 5mM DTT                                                          | Inhibition assay               | 3.1E-10 | 9.509  | 8.957  | 9.845  | 7.299  |
| 1R6Q_A:C    | not stated | not stated              | not stated                                                                                 | SPR                            | 3.3E-07 | 6.482  | 7.019  | 6.877  | 7.668  |
| 1RLB_ABCD:E | 7.4        | 20                      | 50 mM sodium phosphate, 150mM NaCl                                                         | Fluorescence anisotropy        | 8.0E-07 | 6.097  | 6.677  | 6.316  | 6.603  |
| 1S1Q_A:B    | 7.2        | 20                      | 20 mM sodium phosphate, 150mM NaCl, 0.05% bovine serum albumin, 0.01% P20                  | SPR                            | 6.4E-04 | 3.194  | 5.523  | 3.011  | 3.832  |
| 1UUG_A:B    | 8.0        | 25                      | 70 mM Hepes KOH, 1mM EDTA, 1mM dithiothreitol                                              | Stopped-flow fluorescence      | 1.0E-13 | 13.000 | 10.837 | 14.385 | 12.818 |
| 1WDW_BD:A   | 7.0        | 50                      | 50 mm potassium phosphate buffer, 1 mm EDTA, 0.1 mm DTT, 0.02 mm PLP                       | ITC                            | 2.5E-09 | 8.602  | 8.123  | 9.085  | 8.959  |
| 1XD3_A:B    | 7.5        | 25                      | 50 mM HEPES, 0.5 mM EDTA, 0.1 mg/mL ovalbumin, 1-mM DTT                                    | Fluorescence spectrophotometry | 3.0E-07 | 6.523  | 6.375  | 6.295  | 7.168  |
| 1XQS_A:C    | 7.4        | room temperature        | HEPES-KOH, 200 mM KCl, 4 mM MgCl <sub>2</sub> , and 5 mM imidazole                         | SPR                            | 6.5E-06 | 5.187  | 6.029  | 6.343  | 5.313  |
| 1YVB_A:I    | 5.5        | not stated              | 100 mM sodium acetate, 8 mM DTT                                                            | Inhibition assay               | 6.5E-09 | 8.187  | 8.865  | 7.658  | 7.204  |
| 1ZHI_A:B    | 7.2        | 23                      | 25mM phosphate buffer, 200mM NaCl                                                          | ITC                            | 2.0E-07 | 6.699  | 6.841  | 6.011  | 6.758  |
| 1ZM4_A:B    | 7.9        | 25                      | 20mM Tris, 50mM NaCl                                                                       | Flourescence                   | 1.3E-06 | 5.886  | 6.684  | 4.097  | 6.432  |
| 2ABZ_B:E    | 7.5        | not stated, probably 25 | 50 mM Tris-HCl buffer, 100mM NaCl                                                          | Spectroscopic inbition assay   | 2.8E-09 | 8.553  | 8.361  | 9.139  | 8.403  |
| 2AQ3_A:B    | 7.2        | not stated              | phosphate-buffered saline                                                                  | ITC                            | 1.2E-05 | 4.921  | 6.463  | 5.309  | 5.219  |
| 2BTF_A:P    | 7.0        | room temperature        | 0.01 M imidazole, 0.15 mM CaCl <sub>2</sub> , 1.5 mM DTE, 1 mM ATP, 2 mM MgCl <sub>2</sub> | Inhibition assay               | 2.3E-06 | 5.638  | 6.771  | 5.640  | 6.323  |

|           |                                      |         |                                                                                                                   |                                     |         |        |        |        |        |
|-----------|--------------------------------------|---------|-------------------------------------------------------------------------------------------------------------------|-------------------------------------|---------|--------|--------|--------|--------|
| 2COL_A:B  | 7.4                                  | 35      | 100 mM potassium phosphate, 1 mM DTT                                                                              | ITC                                 | 1.1E-07 | 6.959  | 7.614  | 6.522  | 6.492  |
| 2HLE_A:B  | 7.8                                  | 25      | 50 mM Tris, 150 mM NaCl, and 1 mM CaCl <sub>2</sub>                                                               | ITC                                 | 4.0E-08 | 7.398  | 7.681  | 7.213  | 8.507  |
| 2HRK_A:B  | 7.4                                  | 25      | 20 mM Hepes, 150 mM NaCl, 2 mM EDTA and 0.005% Tween 20                                                           | SPR                                 | 9.0E-09 | 8.046  | 8.671  | 9.411  | 7.522  |
| 2J0T_A:D  | 7.5                                  | 37      | 50 mM Tris-HCl, 0.15 m NaCl, 10 mM CaCl <sub>2</sub> , 0.02% Brij 35                                              | Fluorescence inhibition assay       | 4.0E-10 | 9.398  | 8.237  | 8.929  | 8.699  |
| 2JEL_HL:P | 7.2                                  | 23      | 15 mM sodium phosphate buffer, 30 mM NaCl, 0.1 mg/ml bovine serum albumin                                         | Fluorescence inhibition assay       | 2.8E-09 | 8.553  | 7.172  | 8.143  | 8.115  |
| 2O3B_A:B  | 7.0                                  | 25      | 50 mM Tris-HCl, 50 mM NaCl, 1 mM EDTA, 0.01% Triton X-100, 0.01% bovine serum albumin, and 5 mM MnCl <sub>2</sub> | Inhibition assay                    | 3.2E-12 | 11.495 | 8.952  | 12.208 | 11.059 |
| 2OOR_AB:C | 7.2                                  | 25      | 50 mM Mops, 50 mM KCl, 2 mM MgCl <sub>2</sub>                                                                     | Fluorescence                        | 1.6E-08 | 7.796  | 7.665  | 8.426  | 9.513  |
| 2OZA_B:A  | 8.0                                  | 25      | 50 mM Tris-HCl, 100 mM NaCl, 0.01% BSA, 0.01% CHAPS, and 500 M TCEP.                                              | SPR                                 | 2.5E-09 | 8.602  | 8.308  | 7.690  | 7.839  |
| 2PCC_A:B  | 6.0                                  | 25      | 50 mM DMG buffer                                                                                                  | ITC                                 | 1.6E-06 | 5.796  | 5.057  | 4.516  | 6.479  |
| 2SNI_E:I  | 8.5                                  | 25      | 10 mM TRIS-HCl                                                                                                    | Inhibition assay                    | 2.0E-12 | 11.699 | 10.030 | 11.285 | 10.870 |
| 2TGP_Z:I  | 8.0                                  | 20      | 0.1M TRIS-HCl, 0.02M CaCl <sub>2</sub>                                                                            | Spectroscopic inhibition assay      | 2.4E-06 | 5.620  | 6.758  | 4.772  | 5.026  |
| 2VIR_AB:C | not stated (BIAcore standard is 7.4) | 25      | not stated, but BIAcore standard buffer is 10 mM HEPES, 3.4 mM EDTA, 0.001% surfactant P-20, 150 mM NaCl          | SPR                                 | 1.0E-09 | 9.000  | 8.433  | 8.517  | 9.477  |
| 2WPT_A:B  | 7.0                                  | 25      | 50 mM Mops buffer containing 200 mM NaCl and 1 mM DTT                                                             | Stopped-flow fluormetry             | 1.5E-08 | 7.824  | 8.205  | 8.884  | 8.638  |
| 3CPH_G:A  | 7.5                                  | 25      | 100 mM NaCl, 2 mM MgCl <sub>2</sub> , 2 mM β-mercaptoethanol, 10 μm GDP                                           | ITC                                 | 3.3E-07 | 6.482  | 7.160  | 6.833  | 6.471  |
| 3SGB_E:I  | 8.3                                  | 22      | 0.1M Tris-HCl, 0.02M CaCl <sub>2</sub> , 0.005% w/v Triton X-100                                                  | Spectrophotometric inhibition assay | 1.8E-11 | 10.745 | 9.899  | 11.631 | 10.534 |
| 1AHW_AB:C | not stated                           | ambient | 5 mM CaCl <sub>2</sub>                                                                                            | Competitive Inhibition assay        | 3.4E-09 | 8.469  | 8.799  | 7.701  | 7.972  |
| 1ATN_A:D  | 8.0                                  | 30      | 10 mM Tris-HCl, 1 mM MgCl <sub>2</sub> , 0.1 mM CaCl <sub>2</sub>                                                 | Spectrophotometric inhibition assay | 2.0E-09 | 8.699  | 9.527  | 9.522  | 8.659  |

|            |            |            |                                                                                                        |                           |         |        |        |        |        |
|------------|------------|------------|--------------------------------------------------------------------------------------------------------|---------------------------|---------|--------|--------|--------|--------|
| 1BUH_A:B   | 7.4        | not stated | 10 mM HEPES, 3.4 mM EDTA, 0.001% surfactant P-20, 150mM NaCl                                           | SPR                       | 7.7E-08 | 7.114  | 7.381  | 7.788  | 7.081  |
| 1DE4_AB:CF | 7.5        | not stated | 50 mM Pipes, 150 mM NaCl, 0.005 Surfactant P-20 (Pharmacia)                                            | SPR                       | 6.8E-08 | 7.168  | 7.889  | 6.847  | 7.365  |
| 1E6E_A:B   | 7.4        | not stated | 0.01M HEPES, 0.15M NaCl, 0.005% Surfactant P20                                                         | SPR                       | 8.6E-07 | 6.066  | 6.430  | 5.464  | 5.648  |
| 1EER_A:BC  | 7.4        | 25         | 10mM HEPES, 150mM NaCl, 0.005% P20, 0.1 mg/mL bovine serum albumin                                     | SPR                       | 3.7E-12 | 11.432 | 11.302 | 12.052 | 10.282 |
| 1EWY_A:C   | 8.0        | 25         | 50mM Tris-HCl                                                                                          | Spectroscopic assay       | 3.6E-06 | 5.444  | 6.019  | 2.739  | 4.839  |
| 1FSK_BC:A  | 7.4        | 25         | HBS-EP biacore buffer                                                                                  | SPR                       | 2.4E-10 | 9.620  | 8.419  | 8.489  | 10.181 |
| 1GPW_A:B   | not stated | 25         | 50 mM potassium phosphate                                                                              | Fluorescence Titration    | 5.0E-09 | 8.301  | 8.731  | 8.864  | 8.205  |
| 1HE8_B:A   | 7.5        | 20         | 20 mM Tris, 2 mM MgCl <sub>2</sub> , 1 mM DTT                                                          | Stopped-flow fluometry    | 3.2E-06 | 5.495  | 7.050  | 7.003  | 5.523  |
| 1IBR_A:B   | 7.4        | 20         | 20 mM KPi, 5 mM MgCl <sub>2</sub> , 1 mM DTE, and 0.1 g/L BSA                                          | Fluorescence titration    | 1.0E-09 | 9.000  | 8.174  | 8.532  | 7.181  |
| 1J2J_A:B   | 8.0        | 25         | 20 mM Tris-HCl, 100 mM NaCl, 5 mM MgCl <sub>2</sub> and 1 mM DTT                                       | SPR                       | 1.1E-06 | 5.959  | 7.390  | 6.176  | 5.201  |
| 1K5D_AB:C  | 7.5        | 20         | 100mM Tris-HCl, 5% glycerol, 5mM MgCl <sub>2</sub> , 5mM dithioerythritol                              | Stopped-flow fluorescence | 3.0E-10 | 9.523  | 9.208  | 9.872  | 9.505  |
| 1KTZ_A:B   | 7.4        | 25         | 150mM NaCl, 3.4mM EDTA, 0.005% Tween-20                                                                | SPR                       | 2.9E-07 | 6.538  | 6.300  | 6.717  | 8.807  |
| 1M10_A:B   | 7.4        | 25         | 150 mM NaCl, 0.005% Tween-20, 25 mM HEPES                                                              | SPR                       | 5.8E-09 | 8.237  | 7.482  | 8.777  | 9.555  |
| 1NB5_AP:I  | 7.0        | 25         | 100mM phosphate buffer, 2mM dithiothreitol, 1.5mM EDTA                                                 | Inhibition assay          | 6.9E-11 | 10.161 | 8.661  | 10.402 | 9.492  |
| 1NVU_Q:S   | 7.5        | not stated | 25 mM Tris-Cl, 50 mM NaCl, 1 mM DTT                                                                    | Fluorescence anisotropy   | 3.6E-06 | 5.444  | 5.863  | 7.242  | 7.206  |
| 1OC0_A:B   | not stated | not stated | not stated                                                                                             | Fluorescence titration    | 1.0E-09 | 9.000  | 8.511  | 9.822  | 10.072 |
| 1QA9_A:B   | 7.4        | 37         | HBS, 150mM NaCl, 1mM MgCl <sub>2</sub> , 1mM CaCl <sub>2</sub> , 10mM Na azide, 0.005% Surfactant P-20 | SPR                       | 9.0E-06 | 5.046  | 6.517  | 4.007  | 4.825  |
| 1RV6_VW:X  | 7.2        | 37         | 10mM Hepes, 0.5% BSA, NaOH                                                                             | Inhibition assay          | 1.7E-10 | 9.770  | 9.671  | 9.515  | 8.798  |
| 1US7_A:B   | 8.0        | 30         | 40 mM Tris, 1mM EDTA, 5mM NaCl                                                                         | ITC                       | 1.5E-06 | 5.824  | 6.814  | 6.810  | 5.950  |

|            |                                      |                  |                                                                                                               |                                |         |        |       |       |        |
|------------|--------------------------------------|------------------|---------------------------------------------------------------------------------------------------------------|--------------------------------|---------|--------|-------|-------|--------|
| 1VFB_AB:C  | 7.1                                  | 24               | 150mM NaCl, 10mM phosphate buffer                                                                             | ITC                            | 3.7E-09 | 8.432  | 7.728 | 7.006 | 8.488  |
| 1XU1_ABD:T | 7.4                                  | not stated       | 10 mM HEPES, 150 mM NaCl, 3.4 mM EDTA, 0.005% Surfactant P20                                                  | SPR                            | 6.4E-09 | 8.194  | 8.097 | 9.145 | 9.142  |
| 1ZLI_A:B   | 7.5                                  | 23               | 50mM Tris-HCl, 100 mM NaCl                                                                                    | Inhibitor assay                | 1.3E-09 | 8.886  | 8.336 | 9.511 | 8.801  |
| 2B4J_AB:C  | 7.4                                  | room temperature | 25 mM Tris, 150 mM NaCl, 2 mM MgCl <sub>2</sub> , 0.1% Nonidet P-40, 1 mg/ml bovine serum albumin             | Fluorescence inhibition assay  | 1.1E-08 | 7.959  | 8.327 | 6.405 | 8.013  |
| 2FJU_B:A   | not stated (standard is 7.4)         | 25               | HEPES, 5mM MgCl <sub>2</sub>                                                                                  | SPR                            | 5.3E-06 | 5.276  | 6.476 | 4.634 | 5.098  |
| 2HQS_A:H   | 7.5                                  | 20               | 50 mM buffer, 50 mM NaCl, 5 mM EDTA. Value is averaged over 5 buffers: sodium phosphate, Hepes, MES, BES, TES | ITC                            | 2.7E-08 | 7.569  | 7.576 | 8.428 | 8.616  |
| 2MTA_HL:A  | 7.5                                  | 30               | 4.5 nM methylamine dehydrogenase and 2.5 mM amicyanin in 0.01 M potassium phosphate                           | Spectroscopic inhibition assay | 4.5E-06 | 5.347  | 6.539 | 5.174 | 5.247  |
| 2OOB_A:B   | 7.0                                  | 19.85            | 25 mM phosphate buffer, 70 mM NaCl                                                                            | ITC                            | 6.0E-05 | 4.222  | 5.369 | 5.630 | 6.323  |
| 2SIC_E:I   | 7.0                                  | 25               | PBS 0.1mM NaCl                                                                                                | Fluorescence titration         | 7.1E-11 | 10.149 | 8.383 | 8.866 | 10.450 |
| 2VIS_AB:C  | not stated (BIAcore standard is 7.4) | 25               | not stated, but BIAcore standard buffer is 10 mM HEPES, 3.4 mM EDTA, 0.001% surfactant P-20, 150mM NaCl       | SPR                            | 4.0E-06 | 5.398  | 6.201 | 5.907 | 4.886  |

### Test set

| Complex <i>a</i> | Experimental condition and method |                  |                                                             |                                     | Experimental affinity    |                        | Predicted affinity (p <i>K<sub>d</sub></i> ) |        |        |
|------------------|-----------------------------------|------------------|-------------------------------------------------------------|-------------------------------------|--------------------------|------------------------|----------------------------------------------|--------|--------|
|                  | pH                                | Temperature (°C) | Buffer                                                      | Method                              | <i>K<sub>d</sub></i> (M) | p <i>K<sub>d</sub></i> | GA-PLS                                       | GA-SVM | GA-GP  |
| 1AK4_A:D         | 6.5                               | 20               | 25 mM KPO <sub>4</sub> , 5 mM β-mercaptoethanol, 100 mM KCl | ITC                                 | 1.6E-05                  | 4.796                  | 7.305                                        | 3.665  | 5.179  |
| 1AVZ_B:C         | 7.5                               | 25               | 20mM phosphate buffer, 2mM EGTA, and 5mM DTT, 500mM NaCl    | ITC                                 | 1.6E-05                  | 4.796                  | 6.652                                        | 4.240  | 5.250  |
| 1BRS_A:D         | 8.0                               | 25               | 0.2 M ammonium acetate, 1.0 mM EDTA                         | Fluorescence inhibition assay       | 2.0E-13                  | 12.699                 | 9.372                                        | 13.305 | 12.728 |
| 1CBW_ABC:D       | 8.2                               | 22               | 50 mM Tris-HCl<br>10mM HEPES, 150 mM                        | Spectrophotometric inhibition assay | 1.1E-08                  | 7.959                  | 7.481                                        | 6.444  | 7.226  |

|           |            |                  |                                                                                                                         |                               |         |        |        |        |        |
|-----------|------------|------------------|-------------------------------------------------------------------------------------------------------------------------|-------------------------------|---------|--------|--------|--------|--------|
| 1E6J_HL:P | 7.4        | not stated       | NaCl, 3.4 mM EDTA, 0.05% surfactant P20                                                                                 | SPR                           | 2.9E-08 | 7.538  | 7.518  | 6.506  | 7.219  |
| 1EMV_A:B  | 7.0        | 25               | 50 mM Mops buffer containing 200 mM NaCl                                                                                | Stopped-flow fluorimetry      | 2.4E-14 | 13.620 | 9.771  | 11.240 | 11.967 |
| 1F6M_A:C  | 8.0        | room temperature | not stated                                                                                                              |                               | 2.7E-06 | 5.569  | 6.846  | 5.110  | 5.113  |
| 1GCQ_B:C  | 7.4        | 25               | 10mM HEPES, 150mM NaCl, 3mM EDTA, 0.005% polysorbate 20, 2.5mM 2-mercaptoethanol                                        | SPR                           | 1.7E-05 | 4.770  | 6.768  | 5.485  | 5.548  |
| 1GXD_A:C  | 7.2        | 25               | 7.8 mM NaH <sub>2</sub> PO <sub>4</sub> , 8 mM Na <sub>2</sub> HPO <sub>4</sub> , 137 mM NaCl, 0.1 mM CaCl <sub>2</sub> | SPR                           | 5.2E-09 | 8.284  | 8.130  | 8.536  | 9.355  |
| 1HCF_AB:X | 7.4        | not stated       | 0.01M Hepes, 150mM NaCl, 3mM EDTA, 0.005% polysorbate 20                                                                | SPR                           | 2.6E-10 | 9.585  | 9.361  | 8.326  | 9.363  |
| 1IB1_AB:E | 6.5        | 4                | 50 mM sodium citrate, 5 mM 2-mercaptoethanol                                                                            | Sedimentation equilibrium     | 2.0E-08 | 7.699  | 8.010  | 8.885  | 8.874  |
| 1JMO_A:HL | 7.4        | room temperature | HNP, 2mg/ml bovine serum albumin                                                                                        | Inhibition assay              | 1.2E-07 | 6.921  | 8.010  | 5.850  | 6.577  |
| 1KAC_A:B  | 7.4        | 25               | 10mM HEPES, 150mM NaCl, 3mM EDTA, 0.005% P-20 surfactant                                                                | SPR                           | 1.5E-08 | 7.824  | 7.307  | 6.899  | 7.319  |
| 1KXP_A:D  | 7.4        | 25               | 10 mM Tris-HCl, 0.5 mM ATP, 0.1 mM EDTA, 0.2 mM CaCl <sub>2</sub> , 0.1 mM dithiothreitol, 0.1 mM Na <sub>3</sub>       | Inhibition assay              | 9.0E-10 | 9.046  | 8.736  | 9.118  | 9.300  |
| 1MAH_A:F  | 7.5        | 26               | 10mM Tris-HCl, 100mM NaCl, 0.1mg/ml BSA                                                                                 | Inhibition assay              | 2.5E-11 | 10.602 | 10.187 | 10.701 | 8.323  |
| 1NSN_HL:S | not stated | not stated       | not stated                                                                                                              | ELISA inhibition assay        | 1.0E-10 | 10.000 | 9.613  | 10.854 | 9.972  |
| 1OPH_A:B  | not stated | not stated       | not stated                                                                                                              | Fluorescence inhibition assay | 5.0E-09 | 8.301  | 7.760  | 8.296  | 7.965  |
| 1R0R_E:I  | 8.3        | 21               | 0.1 M Tris-HCl, 0.005% Triton X-100, 0.02 M CaCl <sub>2</sub>                                                           | Spectrophotometry             | 2.9E-11 | 10.538 | 9.923  | 12.115 | 10.403 |
| 1T6B_X:Y  | 8.0        | 20               | not stated                                                                                                              | Stopped-flow fluorescence     | 1.7E-10 | 9.770  | 8.424  | 8.425  | 8.114  |
| 1WQ1_R:G  | 7.5        | 30               | 20 mM Tris-HCl, 1 mM MgCl <sub>2</sub> , 0.1 mM dithiothreitol, no NaCl                                                 | Fluorescence                  | 1.7E-05 | 4.770  | 6.363  | 6.493  | 6.523  |
| 1Z0K_A:B  | 7.5        | not stated       | 10mM Tris, 160mM NaCl, 2mM MgCl <sub>2</sub> , 0.005% Tween 20                                                          | SPR                           | 7.7E-06 | 5.114  | 5.395  | 6.533  | 6.851  |
| 2A9K_A:B  | 7.5        | 37               | 20mM Tris-HCl, 50mM NaCl, 2mM MgCl <sub>2</sub> , 2mM DTE                                                               | ITC                           | 6.0E-08 | 7.222  | 7.418  | 8.658  | 8.965  |
| 2B42_A:B  | 5.0        | 22               | 100 mM sodium acetate                                                                                                   | SPR                           | 1.1E-09 | 8.959  | 10.206 | 9.870  | 9.246  |

|           |                                   |                  |                                                                                                                      |                                        |         |        |        |        |        |
|-----------|-----------------------------------|------------------|----------------------------------------------------------------------------------------------------------------------|----------------------------------------|---------|--------|--------|--------|--------|
| 2GOX_A:B  | 7.4                               | 25               | 10 mM sodium phosphate,<br>150 mM sodium chloride,<br>0.005% Tween-20                                                | SPR                                    | 1.4E-09 | 8.854  | 8.320  | 10.308 | 9.515  |
| 2I25_N:L  | 7.4                               | 25               | 10 mM HEPES, 0.15 M<br>NaCl, 3.4 mM EDTA,<br>0.005% surfactant P20                                                   | SPR                                    | 1.0E-09 | 9.000  | 7.703  | 9.492  | 9.108  |
| 2NYZ_AB:D | 7.4                               | 25               | 20 mM Hepes, 150 mM<br>NaCl, and 0.005% Triton<br>X-100                                                              | SPR                                    | 5.0E-10 | 9.301  | 9.179  | 9.065  | 8.872  |
| 2OUL_A:B  | 5.5                               | not stated       | 8 mM DTT                                                                                                             | Inhibition assay                       | 1.7E-09 | 8.770  | 8.250  | 12.066 | 10.095 |
| 2PTC_E:I  | 8.0                               | 25               | 50mM TRIS, 50mM CaCl <sub>2</sub> ,<br>0.2mM NaCl                                                                    | Inhibition assay                       | 6.0E-14 | 13.222 | 12.231 | 13.159 | 11.848 |
| 2VDB_A:B  | not<br>stated<br>(7.5<br>assumed) | ambient          | PBS 0.02% NaN <sub>3</sub> , 0.5%<br>Tween 20                                                                        | Radioligand inhibition assay           | 1.5E-10 | 9.824  | 10.447 | 10.258 | 9.268  |
| 3BP8_AB:C | 8.0                               | not stated       | 10 mM Hepes, 200 mM<br>NaCl, 10 mM KCl, 1 mM<br>MgCl <sub>2</sub> , 1 mM DTT, and<br>0.005% Tween 20                 | SPR                                    | 4.1E-09 | 8.387  | 9.448  | 9.212  | 8.744  |
| 4CPA_A:I  | 7.5                               | 25               | 0.02M TRIS-HCl                                                                                                       | Spectrophotometric inhibition<br>assay | 5.0E-09 | 8.301  | 9.525  | 8.739  | 8.720  |
| 1AY7_A:B  | 8.0                               | not stated       | 0.2M ammonium acetate,<br>1mM NaEDTA                                                                                 | Fluorescence inhibition assay          | 2.0E-10 | 9.699  | 8.588  | 8.897  | 8.527  |
| 1DQJ_AB:C | 7.5                               | 25               | Hepes-buffered saline<br>(HBS) containing 150 mM<br>NaCl, 0.005% Surfactant P-<br>20 (Pharmacia), and 10 mM<br>Hepes | SPR                                    | 2.8E-09 | 8.553  | 8.997  | 6.468  | 8.026  |
| 1FC2_C:D  | 6.0                               | 25               | 20mM PBS                                                                                                             | Stopped-flow fluorescence              | 2.3E-08 | 7.638  | 6.796  | 8.869  | 8.691  |
| 1H1V_A:G  | 8.0                               | 20               | 25mM Tris-HCl, 0.8mM<br>CaCl <sub>2</sub> , 0.12mM MgCl <sub>2</sub> ,<br>and 1 mM NaN <sub>3</sub>                  | Fluorescence spectroscopy              | 2.5E-08 | 7.602  | 9.204  | 8.839  | 8.893  |
| 1JPS_HL:T | 7.2                               | room temperature | PBS-0.5% BSA, 0.05%<br>Tween20                                                                                       | SPR                                    | 1.0E-10 | 10.000 | 10.145 | 9.347  | 9.029  |
| 1MLC_AB:E | 7.4                               | 25               | HBS, 150mM NaCl,<br>3.4mM EDTA, 0.005%<br>surfactant P-20, 10mM<br>HEPES                                             | SPR                                    | 9.1E-08 | 7.041  | 7.868  | 8.112  | 8.348  |
| 1PPE_E:I  | 8.3                               | 22               | 100mM Tris, 20mM CaCl <sub>2</sub> ,<br>0.01% Triton X100                                                            | Spectrophotometric inhibition<br>assay | 3.0E-12 | 11.523 | 10.403 | 11.070 | 13.148 |
| 1WEJ_HL:F | not<br>stated                     | not stated       | PBS                                                                                                                  | Spectroscopic inhibition assay         | 7.1E-10 | 9.149  | 8.363  | 9.104  | 8.816  |
| 2AJF_A:E  | not<br>stated                     | not stated       | HBS-EP buffer                                                                                                        | SPR                                    | 1.6E-08 | 7.796  | 7.450  | 9.543  | 9.346  |
| 2I9B_E:A  | 7.4                               | 25               | PBS, 0.005% Tween 20<br>0.010 M potassium                                                                            | SPR                                    | 3.3E-10 | 9.482  | 8.733  | 10.214 | 9.252  |



|          |     |            |                                                                          |                  |         |       |       |       |       |
|----------|-----|------------|--------------------------------------------------------------------------|------------------|---------|-------|-------|-------|-------|
| 2PCB_A:B | 6.0 | 25         | phosphate, with added<br>KNO3 to adjust the ionic<br>strength to 0.050 M | ITC              | 1.0E-05 | 5.000 | 7.356 | 4.387 | 5.607 |
| 3BZD_A:B | 7.2 | not stated | phosphate-buffered saline                                                | ITC              | 9.6E-08 | 7.018 | 7.952 | 5.330 | 5.133 |
| 2UUY_A:B | 8.0 | 25         | 20 mM Tris, 2.5 mM CaCl2                                                 | Inhibition assay | 5.6E-09 | 8.252 | 7.279 | 8.404 | 7.826 |

*a* PDB entry with the chain codes noted AB:C to represent a complex where chains A and B make up component 1, chain C, component 2.
