# Supplementary material for: Biomacromolecular quantitative structure–activity relationship (BioQSAR): a proof-of-concept study on the modeling, prediction and interpretation of protein–protein binding affinity
Source: Springer Nature journal article supplement (doi:10.1007/s10822-012-9625-3), 2013-01-01
Supplement: 10822_2012_9625_MOESM2_ESM.pdf [file 10822_2012_9625_MOESM2_ESM.pdf]

## Supporting Information

**Table S2.** The 110 descriptors used to characterize protein–protein interface

| No. | Descriptor                                 | Type                      | Software         |
|-----|--------------------------------------------|---------------------------|------------------|
| 1   | The number of residues                     | Constitutional descriptor | ProtorP [1]      |
| 2   | The number of polar residues               | Constitutional descriptor | ProtorP [1]      |
| 3   | The number of nonpolar residues            | Constitutional descriptor | ProtorP [1]      |
| 4   | The number of neutral residues             | Constitutional descriptor | ProtorP [1]      |
| 5   | The number of positively charged residues  | Constitutional descriptor | ProtorP [1]      |
| 6   | The number of negatively charged residues  | Constitutional descriptor | ProtorP [1]      |
| 7   | The number of aromatic residues            | Constitutional descriptor | ProtinDB [2]     |
| 8   | The number of hotspot residues             | Constitutional descriptor | KFC2 [3]         |
| 9   | The number of critical residues            | Constitutional descriptor | PCRPI-W [4]      |
| 10  | The percentage of buried residues          | Constitutional descriptor | ProScale [5]     |
| 11  | The percentage of accessible residues      | Constitutional descriptor | ProScale [5]     |
| 12  | The number of hydroxyl groups              | Constitutional descriptor | PSAIA [6]        |
| 13  | The number of amides                       | Constitutional descriptor | PSAIA [6]        |
| 14  | The number of carboxyl groups              | Constitutional descriptor | PSAIA [6]        |
| 15  | The number of ammonium salts               | Constitutional descriptor | PSAIA [6]        |
| 16  | The number of sulfhydryl groups            | Constitutional descriptor | PSAIA [6]        |
| 17  | The number of benzene rings                | Constitutional descriptor | PSAIA [6]        |
| 18  | The number of atoms                        | Constitutional descriptor | ProtorP [1]      |
| 19  | The number of heavy atoms                  | Constitutional descriptor | ProFace [7]      |
| 20  | The number of hydrogen atoms               | Constitutional descriptor | ProFace [7]      |
| 21  | The number of carbon atoms                 | Constitutional descriptor | ProFace [7]      |
| 22  | The number of oxygen atoms                 | Constitutional descriptor | ProFace [7]      |
| 23  | The number of nitrogen atoms               | Constitutional descriptor | ProFace [7]      |
| 24  | The number of sulfur atoms                 | Constitutional descriptor | ProFace [7]      |
| 25  | The relative quantity of $\alpha$ -helices | Constitutional descriptor | DSSP [8]         |
| 26  | The relative quantity of $\beta$ -strands  | Constitutional descriptor | DSSP [8]         |
| 27  | The relative quantity of coils             | Constitutional descriptor | DSSP [8]         |
| 28  | Number of pocket                           | Constitutional descriptor | Q-SiteFinder [9] |
| 29  | Sum of atomic contact vectors              | Contacting descriptor     | NOXclass [10]    |
| 30  | Atomic contact energy                      | Contacting descriptor     | FastContact [11] |
| 31  | Residue contact propensity                 | Contacting descriptor     | FastContact [11] |
| 32  | Pairwise interaction                       | Contacting descriptor     | HORI [12]        |
| 33  | Triplet interaction                        | Contacting descriptor     | HORI [12]        |
| 34  | Quadruple interaction                      | Contacting descriptor     | HORI [12]        |
| 35  | The number of residue-pairs in contact     | Contacting descriptor     | CMappro [13]     |
| 36  | The number of atom-pairs in contact        | Contacting descriptor     | SPACE [14]       |
| 37  | Residue match index                        | Contacting descriptor     | HotPatch [15]    |
| 38  | Total empirical contact potential          | Contacting descriptor     | PISA [16]        |
| 39  | Residue interaction index                  | Contacting descriptor     | PISA [16]        |
| 40  | Core steric contact                        | Contacting descriptor     | Probe [17]       |
| 41  | Interface packing rate                     | Contacting descriptor     | Probe [17]       |
| 42  | Complementarity Index                      | Contacting descriptor     | Probe [17]       |
| 43  | Hydrophobic packing index                  | Contacting descriptor     | PSAIA [6]        |
| 44  | Total molecular weight                     | Geometrical descriptor    | ProScale [5]     |
| 45  | Average buried area                        | Geometrical descriptor    | MSMS [18]        |
| 46  | Average exposed area                       | Geometrical descriptor    | MSMS [18]        |
| 47  | Relative size of interface to surface      | Geometrical descriptor    | MSMS [18]        |
| 48  | Accessible surface area of interface       | Geometrical descriptor    | MSMS [18]        |
| 49  | Connectivity index                         | Geometrical descriptor    | EMBnet [19]      |
| 50  | Connectivity correlation                   | Geometrical descriptor    | EMBnet [19]      |
| 51  | Planarity                                  | Geometrical descriptor    | SHARP2 [20]      |
| 52  | Eccentricity                               | Geometrical descriptor    | ProtorP [1]      |

|     |                                             |                            |                  |
|-----|---------------------------------------------|----------------------------|------------------|
| 53  | Length                                      | Geometrical descriptor     | ProtorP [1]      |
| 54  | Breadth                                     | Geometrical descriptor     | ProtorP [1]      |
| 55  | Gap volume                                  | Geometrical descriptor     | ProtorP [1]      |
| 56  | Gap volume index                            | Geometrical descriptor     | ProtorP [1]      |
| 57  | Interface accessibility                     | Geometrical descriptor     | ProtorP [1]      |
| 58  | Voronoi volume                              | Geometrical descriptor     | DiMoVo [21]      |
| 59  | van der Waals volume                        | Geometrical descriptor     | VEGA [22]        |
| 60  | Hotspot size                                | Geometrical descriptor     | KFC2 [3]         |
| 61  | Total pocket size                           | Geometrical descriptor     | Q-SiteFinder [9] |
| 62  | The degree of curvature                     | Geometrical descriptor     | CASTp [23]       |
| 63  | Average diameter                            | Geometrical descriptor     | Plasmod-PPI [24] |
| 64  | Interface roughness                         | Geometrical descriptor     | ProtFract [25]   |
| 65  | Interface topology                          | Geometrical descriptor     | CASTp [23]       |
| 66  | Bulkness                                    | Geometrical descriptor     | ProScale [5]     |
| 67  | Average volume of buried residue            | Geometrical descriptor     | DEPTH [26]       |
| 68  | Electrostatic potential                     | Physicochemical descriptor | DelPhi [27]      |
| 69  | Interfacial polarity                        | Physicochemical descriptor | ProtParam [28]   |
| 70  | Molar refractivity                          | Physicochemical descriptor | VEGA [22]        |
| 71  | Average hydrophobicity                      | Physicochemical descriptor | 2D-GraLab [29]   |
| 72  | Average hydrophilicity                      | Physicochemical descriptor | 2D-GraLab [29]   |
| 73  | Net charge                                  | Physicochemical descriptor | ProtParam [28]   |
| 74  | Positive net charge                         | Physicochemical descriptor | ProtParam [28]   |
| 75  | Negative net charge                         | Physicochemical descriptor | ProtParam [28]   |
| 76  | Dipolar moment                              | Physicochemical descriptor | ProtParam [28]   |
| 77  | Average solubility                          | Physicochemical descriptor | ProtParam [28]   |
| 78  | Amphipathicity                              | Physicochemical descriptor | ProtParam [28]   |
| 79  | Total polarity                              | Physicochemical descriptor | ProScale [5]     |
| 80  | Degree of atomic buriedness                 | Physicochemical descriptor | DEPTH [26]       |
| 81  | Average flexibility                         | Physicochemical descriptor | ProScale [5]     |
| 82  | Interfacial pI                              | Physicochemical descriptor | ProtParam [28]   |
| 83  | Instability index                           | Physicochemical descriptor | ProtParam [28]   |
| 84  | Aliphatic index                             | Physicochemical descriptor | ProtParam [28]   |
| 85  | Relative mutability                         | Physicochemical descriptor | ProScale [5]     |
| 86  | Membrane tendency                           | Physicochemical descriptor | ProScale [5]     |
| 87  | Refractivity                                | Physicochemical descriptor | ProScale [5]     |
| 88  | Hydrophobic moment                          | Physicochemical descriptor | ProtParam [28]   |
| 89  | Extinction coefficient                      | Physicochemical descriptor | ProtParam [28]   |
| 90  | Average residue depth                       | Physicochemical descriptor | DEPTH [26]       |
| 91  | Average z-scale, vector 1                   | Physicochemical descriptor | PROFEAT [31]     |
| 92  | Average z-scale, vector 2                   | Physicochemical descriptor | PROFEAT [31]     |
| 93  | Average z-scale, vector 3                   | Physicochemical descriptor | PROFEAT [31]     |
| 94  | The number of hydrogen bonds                | Nonbonded descriptor       | HBplus [32]      |
| 95  | The number of water-mediated hydrogen bonds | Nonbonded descriptor       | HBplus [32]      |
| 96  | Hydrogen bond potential                     | Nonbonded descriptor       | 2D-GraLab [29]   |
| 97  | The number of salt bridges                  | Nonbonded descriptor       | 2D-GraLab [29]   |
| 98  | Salt bridge energy                          | Nonbonded descriptor       | 2D-GraLab [29]   |
| 99  | The number of $\pi$ - $\pi$ stacking        | Nonbonded descriptor       | 2D-GraLab [29]   |
| 100 | Desolvation energy                          | Nonbonded descriptor       | 2D-GraLab [29]   |
| 101 | Conformational entropic penalty             | Nonbonded descriptor       | 2D-GraLab [29]   |
| 102 | Hydrophobic packing                         | Nonbonded descriptor       | 2D-GraLab [29]   |
| 103 | The electrostatic potential of ion pairs    | Nonbonded descriptor       | 2D-GraLab [29]   |
| 104 | The number of steric interactions           | Nonbonded descriptor       | Probe [17]       |
| 105 | The number of aromatic-sulphur interactions | Nonbonded descriptor       | PIC [32]         |
| 106 | The number of cation- $\pi$ interactions    | Nonbonded descriptor       | PIC [32]         |
| 107 | Long-range electrostatic potential          | Nonbonded descriptor       | DelPhi [27]      |
| 108 | Polar solvation contribution                | Nonbonded descriptor       | DelPhi [27]      |
| 109 | Nonpolar solvation contribution             | Nonbonded descriptor       | 2D-GraLab [29]   |

## References

- [1] C. Reynolds, D. Damerell, S. Jones, ProtorP: a protein–protein interaction analysis server. *Bioinformatics* 2009, 25, 413–414.
- [2] R. A Jordan, Y. EL-Manzalawy, D. Dobbs, V. Honavar, Predicting protein–protein interface residues using local surface structural similarity. *BMC Bioinformatics* 2012, 13, 41.
- [3] X. Zhu, J. C. Mitchell, KFC2: a knowledge-based hot spot prediction method based on interface solvation, atomic density, and plasticity features. *Proteins* 2011, 79, 2671–2683.
- [4] J. S. Mora, S. A. Assi, N. Fernandez-Fuentes, Presaging critical residues in protein interfaces-web server (PCRPI-W): a web server to chart hot spots in protein interfaces. *PLoS ONE* 2010, 5, e12352.
- [5] E. Gasteiger, C. Hoogland, A. Gattiker, S. Duvaud, M. R. Wilkins, R. D. Appel, A. Bairoch, *Protein Identification and Analysis Tools on the ExPASy Server*; (In) John M. Walker (ed): The Proteomics Protocols Handbook, Humana Press, 2005, pp.571–607.
- [6] J. Mihel, M. Šikić, S. Tomić, B. Jeren, K. Vlahoviček, PSAIA — protein structure and interaction analyzer. *BMC Struct. Biol.* 2008, 8, 21.
- [7] R.P. Saha, R.P. Bahadur, A. Pal, S. Mandal, P. Chakrabarti, ProFace: a server for the analysis of the physicochemical features of protein–protein interfaces. *BMC Struct. Biol.* 2006, 6, 11.
- [8] W. Kabsch, C. Sander, Dictionary of protein secondary structure: pattern recognition of hydrogen-bonded and geometrical features. *Biopolymers* 1983, 22, 2577–2637.
- [9] A. T. Laurie, R. M. Jackson, Q-SiteFinder: an energy-based method for the prediction of protein-ligand binding sites. *Bioinformatics* 2005, 21, 1908–1916.
- [10] H. Zhu, F. S. Domingues, I. Sommer, T. Lengauer, NOXclass: prediction of protein–protein interaction types. *BMC Bioinformatics* 2006, 7, 27.
- [11] P. C. Champ, C. J. Camacho, FastContact: a free energy scoring tool for protein–protein complex structures. *Nucleic Acids Res.* 2007, 35, W556–W560.
- [12] P. Sundaramurthy, K. Shameer, R. Sreenivasan, S. Gakkhar, R. Sowdhamini, HORI: a web server to compute higher order residue interactions in protein structures. *BMC Bioinformatics* 2010, 11, S24.
- [13] P. Di Lena, K. Nagata, P. Baldi, Deep architectures for protein contact map prediction. *Bioinformatics* 2012, 28, 2449–2457.
- [14] V. Sobolev, E. Eyal, S. Gerzon, V. Potapov, M. Babor, J. Prilusky, M. Edelman, SPACE: a suite of tools for protein structure prediction and analysis based on complementarity and environment. *Nucleic Acids Res.* 2005, 33, W39–W43.
- [15] F. K. Pettit, E. Bare, A. Tsai, J. U. Bowie, HotPatch: a statistical approach to finding biologically relevant features on protein surfaces. *J. Mol. Biol.* 2007, 369, 863–879.
- [16] E. Krissinel, K. Henrick, Inference of macromolecular assemblies from crystalline state. *J. Mol. Biol.* 2007, 372, 774–797.
- [17] J. M. Word, S. C. Lovell, T. H. LaBean, H. C. Taylor, M. E. Zalis, B. K. Presley, J. S. Richardson, D. C. Richardson, Visualizing and quantifying molecular goodness-of-fit: small-probe contact dots with explicit hydrogen atoms. *J. Mol. Biol.* 1999, 285, 1711–1733.
- [18] M. F. Sanner, A. J. Olson, J. C. Spohner, Reduced surface: an efficient way to compute molecular surfaces. *Biopolymers* 1996, 38, 305–320.
- [19] L. Falquet, L. Bordoli, V. Ioannidis, M. Pagni, C. V. Jongeneel, Swiss EMBnet node web server. *Nucleic Acids Res.* 2003, 31, 3782–3783.
- [20] Y. Murakami, S. Jones, SHARP2: protein–protein interaction predictions using patch analysis. *Bioinformatics* 2006, 22, 1794–1795.
- [21] J. Bernauer, R. P. Bahadur, F. Rodier, J. Janin, A. Poupon, DiMoVo: a Voronoi tessellation-based method for discriminating crystallographic and biological protein–protein interactions. *Bioinformatics* 2008, 24, 652–658.
- [22] A. Pedretti, L. Villa, G. Vistoli, VEGA — an open platform to develop chemo-bio-informatics applications, using plug-in architecture and script programming. *J. Comput. Aid. Mol. Des.* 2004, 18, 167–173.
- [23] T. A. Binkowski, S. Naghibzadeh, J. Liang, CASTp: computed atlas of surface topography

- of proteins. *Nucleic Acids Res.* 2003, 31, 3352–3355.
- [24] Y. Rodriguez-Soca, C. R. Munteanu, J. Dorado, J. Rabuñal, A. Pazos, H. González-Díaz, Plasmod-PPI: a web-server predicting complexbiopolymer targets in plasmodium with entropy measures of protein–protein interactions. *Polymer* 2010, 51, 264–273.
- [25] A. Banerji, I. Ghosh, Revisiting the myths of protein interior: studying proteins with mass-fractal hydrophobicity-fractal and polarizability-fractal dimensions. *PLoS ONE* 2009, 4, e7361.
- [26] K. P. Tan, R. Varadarajan, M. S. Madhusudhan, DEPTH: a web server to compute depth and predict small-molecule binding cavities in proteins. *Nucleic Acids Res.* 2011, 39: W242–W248.
- [27] N. Smith, S. Witham, S. Sarkar, J. Zhang, L. Li, C. Li, E. Alexov, DelPhi web server v2: incorporating atomic-style geometrical figures into the computational protocol. *Bioinformatics* 2012, 28, 1655–1657.
- [28] E. Gasteiger, C. Hoogland, A. Gattiker, S. Duvaud, M. R. Wilkins, R. D. Appel, A. Bairoch, *Protein Identification and Analysis Tools on the ExPASy Server*; (In) J. M. Walker (ed): *The Proteomics Protocols Handbook*, Humana Press, 2005, p571–607.
- [29] P. Zhou, F. Tian, Z. Shang, 2D depiction of nonbonding interactions for protein complexes. *J. Comput. Chem.* 2009, 30, 940–951.
- [30] Z. R. Li, H. H. Lin, L. Y. Han, L. Jiang, X. Chen, Y. Z. Chen, FEAT: a web server for computing structural and physicochemical features of proteins and peptides from amino acid sequence. *Nucleic Acids Res.* 2006, 34, W32–W37.
- [31] R. W. W. Hoof, C. Sander, G. Vriend, Positioning hydrogen atoms by optimizing hydrogen-bond networks in protein structures. *Proteins* 1996, 26, 363–376.
- [32] K. G. Tina, PIC: protein interactions calculator. *Nucleic Acids Res.* 2007, 35, W473–W476.
